# Supplementary material
Source: HighWire-hosted journal article supplement (https://gut.bmj.com/content/gutjnl-2021-326376)
Supplement: inline-supplementary-material-1 [file inline-supplementary-material-1.pdf]

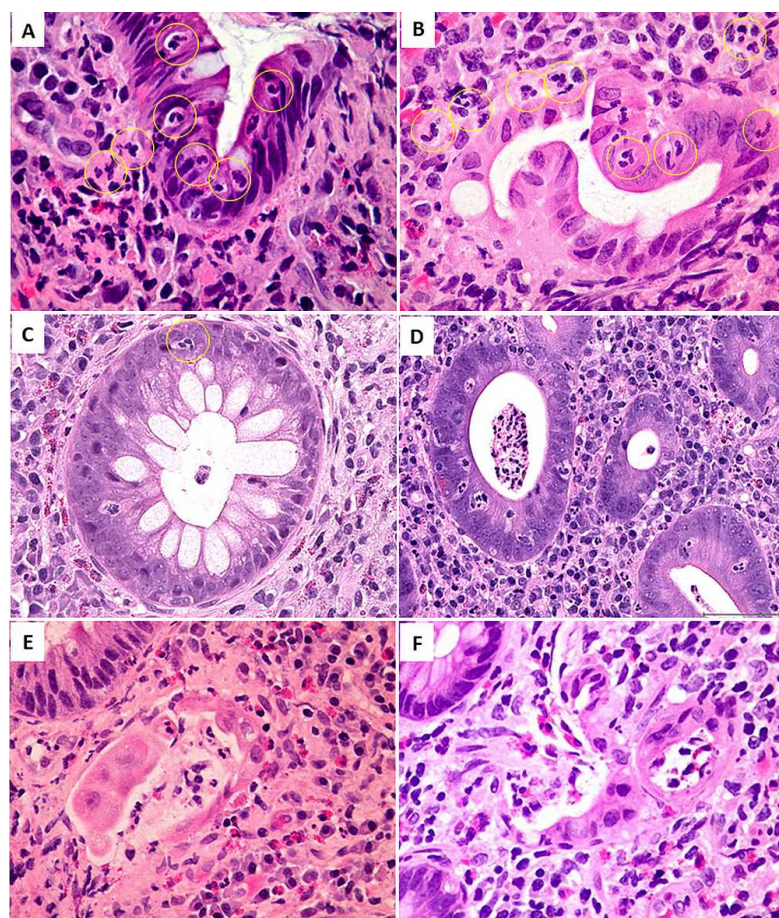

**Supplementary Figure 1.** Examples of active (neutrophilic) inflammation in IBD. A. Neutrophil (within yellow circles) infiltration in surface epithelium ( $\times 600$ ). B. Neutrophil (within yellow circles) infiltration in cryptal epithelium (cryptitis) ( $\times 600$ ) and in lamina propria. C. A single neutrophil infiltration in cryptal epithelium (still called cryptitis) ( $\times 600$ ). The single inflammatory cell (possibly eosinophil) in the lumen here is not considered as crypt abscess. D. Cryptitis with groups of neutrophils in the lumen, interpreted as a crypt abscess ( $\times 400$ ), although with minimal cryptal epithelial cell damage. E/F. Crypt abscess with cryptal epithelium destruction ( $\times 400$ ).
