# Supplementary material
Source: HighWire-hosted journal article supplement (https://gut.bmj.com/content/gutjnl-2021-326376)
Supplement: inline-supplementary-material-4 [file inline-supplementary-material-4.pdf]

**Supplementary Table 2. Comparison between PHRI\_total and PHRI\_max on their correlations with endoscopic scores and with specified clinical outcomes / relapse**

| <b>(A) All patients</b>            |                  |                                   |                  |                                   |
|------------------------------------|------------------|-----------------------------------|------------------|-----------------------------------|
| In correlation with                | PHRI_total       |                                   | PHRI_max         |                                   |
|                                    | <i>Pearson r</i> | <i>Spearman <math>\rho</math></i> | <i>Pearson r</i> | <i>Spearman <math>\rho</math></i> |
| PiCaSSO mucosal score              | 0.766534         | 0.819757                          | 0.792444         | 0.809705                          |
| PiCaSSO vascular score             | 0.722552         | 0.719359                          | 0.711830         | 0.715309                          |
| 6-mon specified clinical outcomes  | 0.471019         | 0.462178                          | 0.428338         | 0.429286                          |
| 12-mon specified clinical outcomes | 0.457633         | 0.437625                          | 0.411784         | 0.403166                          |

  

| <b>(B) MES 0 patients</b>          |                  |                                   |                  |                                   |
|------------------------------------|------------------|-----------------------------------|------------------|-----------------------------------|
| In correlation with                | PHRI_total       |                                   | PHRI_max         |                                   |
|                                    | <i>Pearson r</i> | <i>Spearman <math>\rho</math></i> | <i>Pearson r</i> | <i>Spearman <math>\rho</math></i> |
| PiCaSSO mucosal score              | 0.235775         | 0.237926                          | 0.356568         | 0.243540                          |
| PiCaSSO vascular score             | -0.009007        | 0.091234                          | 0.041375         | 0.100339                          |
| 6-mon specified clinical outcomes  | 0.133529         | 0.103149                          | 0.086716         | 0.099161                          |
| 12-mon specified clinical outcomes | 0.083656         | 0.034196                          | 0.050836         | 0.031718                          |
