# Supplementary material
Source: HighWire-hosted journal article supplement (https://gut.bmj.com/content/gutjnl-2021-326376)
Supplement: inline-supplementary-material-5 [file inline-supplementary-material-5.pdf]

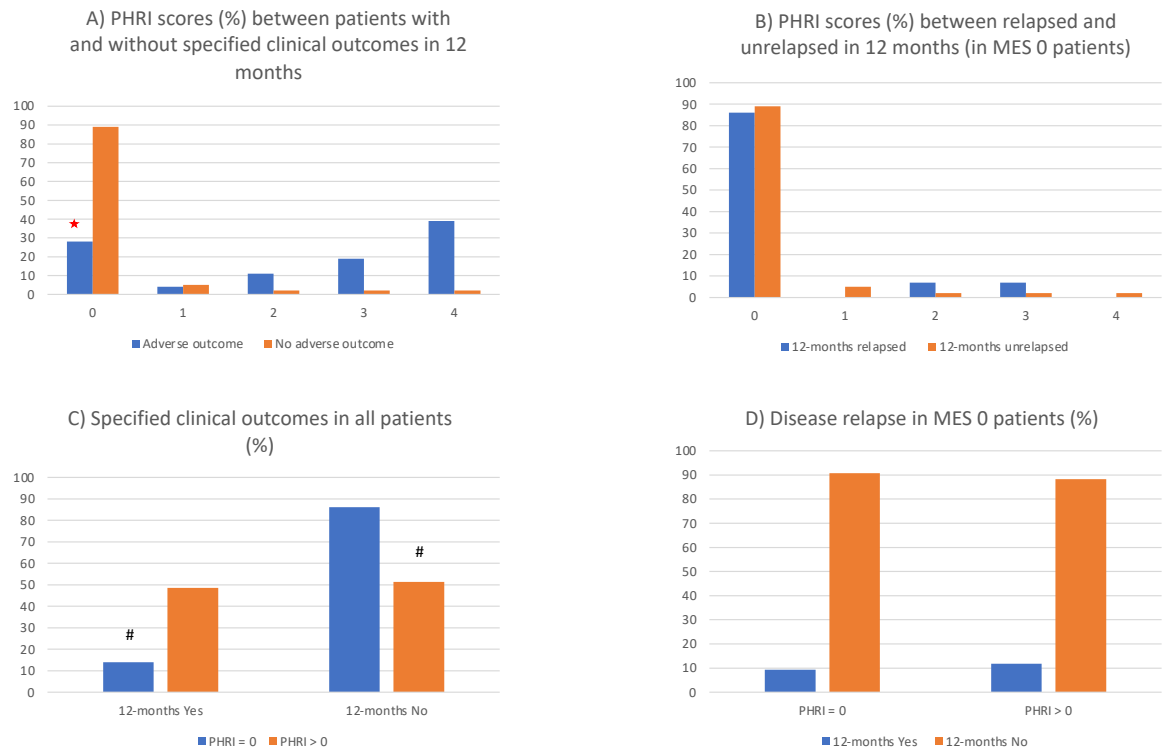

#### Supplementary figure 4.

A/B. Rate of adverse clinical outcomes (including relapse) according to PHRI scores. C/D. Comparison of the specified clinical outcome and relapse rates between patients with PHRI > 0 and those with PHRI = 0. C- all patients, D- MES 0 patients. \*  $p < 0.01$ , #  $p < 0.00001$ .
