# Supplementary material
Source: HighWire-hosted journal article supplement (https://gut.bmj.com/content/gutjnl-2021-326376)
Supplement: inline-supplementary-material-7 [file inline-supplementary-material-7.pdf]

## Supplementary Figure 2

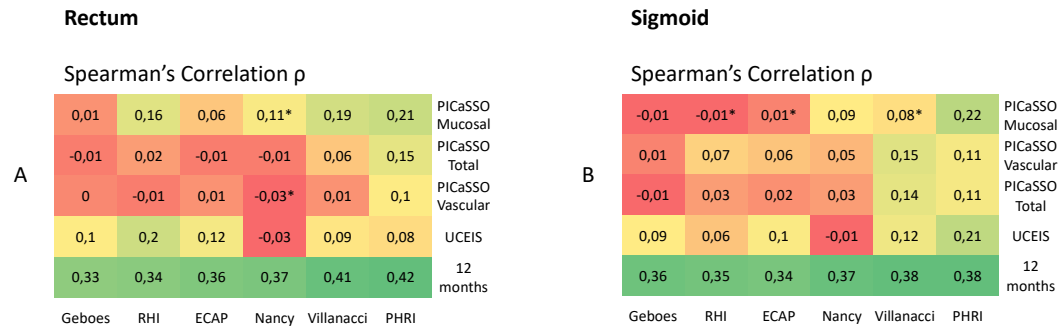

**Supplementary Figure 2** PHRI correlation in patients in endoscopic remission (MES 0) Histological-endoscopic correlation demonstrated by heatmaps showing Spearman correlation coefficients between different histological and endoscopic scores in the **rectum (A)** and in the **sigmoid (B)** and between the endoscopic-histological scores and the specified clinical outcomes at 12 months in patients in endoscopic remission (MES = 0). (0.8-1.0: very strong correlation, 0.6-0.79: strong, 0.40-0.59: moderate, 0.2-0.39: weak) (\*  $p < 0.05$  as compared to PHRI with regard to the correlation strength in the same category of correlation analysis)
